# Supplementary material for: Within-Genome Evolution of REPINs: a New Family of Miniature Mobile DNA in Bacteria
Source: PubMed Central journal article supplement (PMC3116915; doi:10.1371/journal.pgen.1002132), 2011-06-16

A

```

Read 1
@2_21_784_925
CGGCAGAGGTGATACTGGATGCGGTGGAGAGTGTGTGCTGGTCTCAAGCCGCAGGCGTTGATGGATCAGCTCGN
+
AA?@BB<@=@;>@A1>?>@B>1=8..71<49'@4:>6A=;BA;A4>42?; ,5=566#####
Read 2
@2_21_784_925
TTCCAAC TGACAACGGATAACCCCTCCAACATTTTGTATCTCCATCGTTCATAAGGTTGGATCAGGGCTTGNTNNNN
+
BC;BBCBCCABC:BBBBB?B>AB>BAB7B>ABBBABAB@?BB:C=B(>B==BA4@<>@>9@<A#####
Read 1
@1_82_1308_1969
TACTACAAGTCAACGACAAAAGTGCGCCTGAACCTCGACGTGAAGAACCTGTTCAACCGCGAGTATGAAGAACGCG
+
6@AABCA>B>;@?8>?@?A<4;>B<9?@8;A7)=B>A:B6BA@>B:'03>-<:>>?-<B@?A?<>=6@A53&7;@
Read 2
@1_82_1308_1969
ATACCCAGGACCCCTCCACATTGAAGCGGTGTACGCCGTCATAGCGTGTAGGCGAATGCGATGTGGACGGGCAN
+
AAAA99>A5>5:5?5@3<5>=AB@CB@:<A@/=7?99773&1,#####
Read 1
@2_70_1540_677
GACATAACCACCAATCACCACAAAGCCGTAACAGCGTCACCTGACACAACGCCGATCAAACCTGTGGGAGGGGGAT
+
BCBCCCCBCCBCCCCBCCBCCCCB?AA;B?BB>BC@AABCAB@BCCBCCCCB@?=?=@/BA<;AB@B;A@A29
Read 2
@2_70_1540_677
ATTATTGTGATTGCACCGTTTGGATATTCACGCAGATCCCCCTCCACAGTTTGTATCGGCGTTGTGTACAGTGAAG
+
BCCCCBCCBCCCCBCCBCCCCBCCBCCCCBCCBCCCCBACACBCA@A@>@B@A@A@A@8=A@@=6?>AB@;;;:==><@/B9##
Read 1
@1_13_1051_777
CTGTCACCACACGCACAGGTGACGGGTGGTTCGAGAGTAAAATCGTTCGCAAGCTACTTATCTATTTGCGACGCGCA
+
BA@A<A;A@:??A?6<9:/7;>?9'3,'82;A9?=A4177>>9@A?9=:4>207?5<<@?5;//67/33<@#####
Read 2
@1_13_1051_777
GCGGGCAGCGCAGTAGAGTGTGAAGACTGTGTAGTGAGCGCCGGAGCGAAAAGCGCCACCTTTTGGCGCGGTGNN
+
B9AB9==@'@67BBB?:B>AABB6BB<16;2> ,=;3.: (,B16A==; ,5:366#####

```

B

Read 1 @2\_21\_784\_925 matches to region 3857305 – 3857360 (1 – 70) in the SBW25 genome.  
 Read 2 @2\_21\_784\_925:

```

1 10 20 30 40 50 60 70
3857544..3857393 TTCCAAC TGACAACGGATAACCCCTGGGAGGGGGCTGGCCCCGATGGCGGGCTGCAGCCAGGATGATCAA
2_21_784_925 TTCCAAC TGACAACGGATAACCC-----
80 90 100 110 120 130 140 152
3857544..3857393 TGGACGCCCCATCGGGAGCAAGCCCCCTCCACATTTGATCTCCATCGTTCATAAGGTTGGATCAGGGCTTG
2_21_784_925 -----TCCACATTTGATCTCCATCGTTCATAAGGTTGGATCAGGGCTTG

```

Read 1 @1\_82\_1308\_1969 matches to region 2577058 – 2577129 (1 – 72) in the SBW25 genome.  
 Read 2 @1\_82\_1308\_1969:

```

1 10 20 30 40 50 60
2577326..2577202 ATACCCAGGACCCCA TGGGAGGGGGCTTGC TCCCGATGGCAGTAGACCGGTCAATA T TCCG
1_82_1308_1969 ATACCCAGGACCC-----
70 80 90 100 110 120 125
2577326..2577202 TGGACTGATCCACCCTATCGGGAGCAAGCCCCCTCCACATTTGATCGGGCTTACGCCGTCA
1_82_1308_1969 -----CTCCACATTTGATCGGGCTTACGCCGTCA

```

Read 2 @2\_70\_1540\_677 matches to region 790520 – 790547 (1 – 28) and 5683675 – 5683621 (20 – 74) in the SBW25 genome.  
 Read 1 @2\_70\_1540\_677:

```

1 10 20 30 40 50 60 70
5683504..5683657 ATTATTGTGATTGCACCGTTTGGATATTCACGCAGATCCCC TGGGAGGGGGCTGGCCCCGATAGCAGTGTGT CAG
2_70_1540_677 ATTATTGTGATTGCACCGTTTGGATATTCACGCAGATCCCC-----
80 90 100 110 120 130 140 150 154
5683504..5683657 GTAGCTATAGGTTGACTGGCCCCAGCCCATCGGGGCAAGCCCCCTCCACAGTTTGTATCGGGCTTGTGTACAGGTGA
2_70_1540_677 -----CTCCACAGTTTGTATCGGGCTTGTGTACAGGTGA

```

Read 1 @1\_13\_1051\_777 matches to region 6222912 – 6222986 (1 – 75).  
 Read 2 @1\_13\_1051\_777:

```

1 10 20 30 40 50 60 70
6223184..6222982 GCGGTCAGCGCAGTAGAGTGTGAAGACTGTGTAGTACGAGCGGGCTGGCCCCGGCTGGGGGGGGAAGCCGCCCAAT
1_13_1051_777 GCGGTCAGCGCAGTAGAGTGTGAAGACTGTGT-----
80 90 100 110 120 130 140 150
6223184..6222982 AAAGGCACCCACATAGTTTCAGGTAAAGCCGAGTCCCTGATTTGGGGCGGCTGGCCCCCAGCCGGGGGCAAGCC
1_13_1051_777 -----
160 170 180 190 200 203
6223184..6222982 CGCTCACTACAGTGAGCGCCGGAGCGAAAAGCGCCACCTTTTGGCGCG
1_13_1051_777 -----AGTGAGCGCCGGAGCGAAAAGCGCCACCTTTTGGCGCG

```

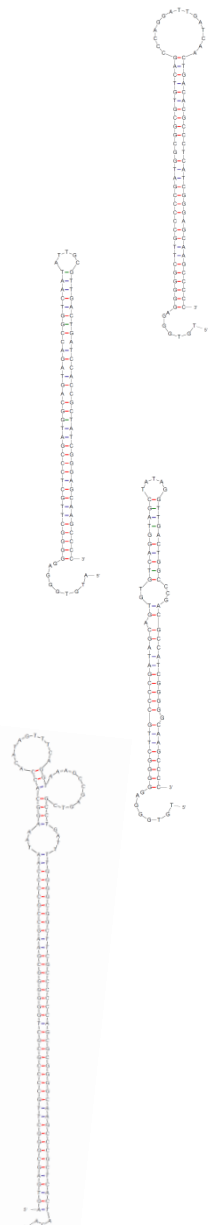

Supplement: pgen.1002132.s006.pdf [file pgen.1002132.s006.pdf]
