# Supplementary material for: Within-Genome Evolution of REPINs: a New Family of Miniature Mobile DNA in Bacteria
Source: PLoS Genet. 2011 Jun 16;7(6):e1002132. doi: 10.1371/journal.pgen.1002132 (PMC3116915; doi:10.1371/journal.pgen.1002132)
Supplement: Figure S10 — REPIN secondary structures found in different genomes predicted by the mfold web server (http://mfold.rna.albany.edu/). Red bars show palindromic parts of the structure. The yellow box indicates the most abundant 16-mer found in the non-coding flanking DNA of the respective RAYT. The GI consensus sequence from Pseudomonas fluorescens SBW25 is the only REPIN shown from RAYT clade I (Figure 4), all other REPINs are associated to RAYTs from clade II. (PDF) [file pgen.1002132.s010.pdf]

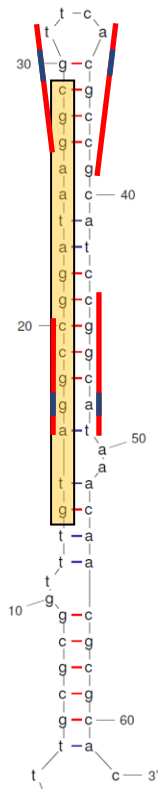

*Escherichia coli* K-12 DH10B  
 Position: 868786..868847  
 16-mer found adjacent to *yafM*

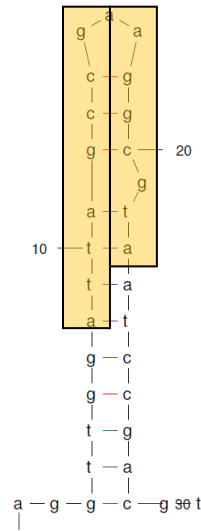

*Pseudomonas stutzeri* A1501  
 Position: 1162127\_1162158  
 16-mer found adjacent to *pst\_1052*  
 No typical REPIN formation, only found  
 adjacent to *pst\_1052*. Perhaps no  
 dissemination possible.

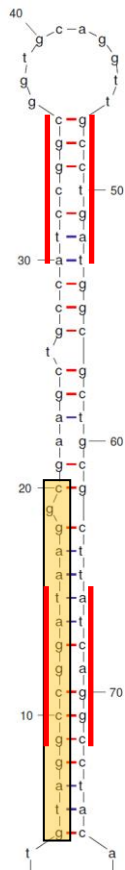

*Salmonella enterica* serovar Paratyphi A  
AKU 12601  
Position: 298766..298843  
16-mer found adjacent to *sspa4070*

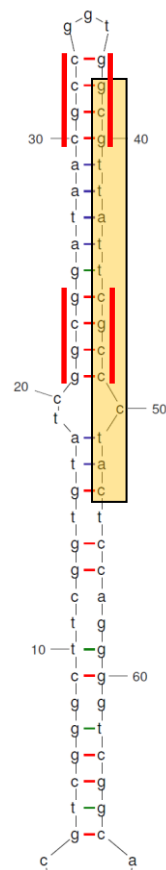

*Pseudomonas aeruginosa* PAO1 PA1154  
Position: 264851..264919  
16-mer found adjacent *pal154*

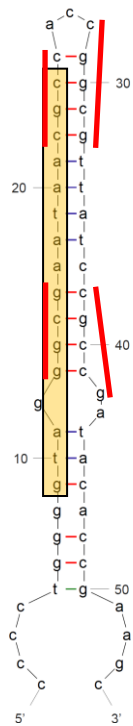

*Pseudomonas aeruginosa* LESB58  
 Position: 257386..257439  
 16-mer found adjacent to *pales\_41671*

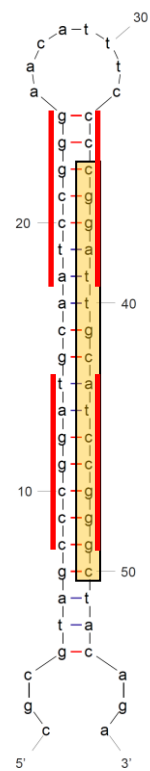

*Pseudomonas mendocina* ymp  
 Position: 213188..213243  
 16-mer found adjacent to *pmen0731*

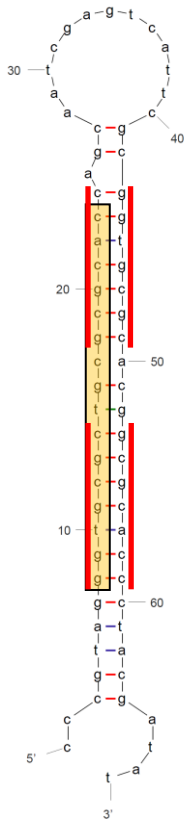

*Pseudomonas mendocina* ymp  
 Position: 58161..58228  
 16-mer found adjacent to *pmen3135*

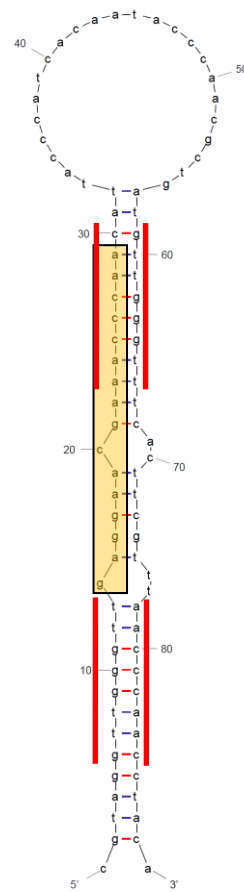

*Nostoc punctiforme* PCC 73102  
 Position: 684772400..6847813  
 16mer found adjacent to *npunF5543*

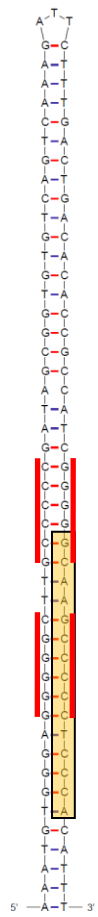

*Pseudomonas fluorescens* SBW25  
GI consensus structure
