# Supplementary material for: Within-Genome Evolution of REPINs: a New Family of Miniature Mobile DNA in Bacteria
Source: PubMed Central journal article supplement (PMC3116915; doi:10.1371/journal.pgen.1002132), 2011-06-16
Supplement: pgen.1002132.s004.pdf [file pgen.1002132.s004.pdf]

A Consensus Identity

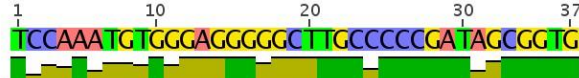

57 GGGCTTGCCTCCGATG  
 58 CCAATGTGGGAGGGGG  
 59 AACTGTGGGAGGGGG  
 65 TCAAATGTGGGAGGGG  
 65 GGCTTGCCCCGATGA  
 65 TTGCCCCGATGGCGG  
 67 TCAAATGTGGGAGGG  
 68 GGGCTTGCCTCCGATA  
 68 GGCTTGCCTCCGATAG  
 70 GCTTGCCTCCGATAGC  
 72 AACTGTGGGAGGGGGCT  
 79 CTTGCCCCGATGGCG  
 86 CCAAATGTGGGAGGGG  
 87 GCCCCGATAGCGGTG  
 88 CCAATGTGGGAGGGGG  
 98 TGCCCCGATAGCGGT  
 99 AAAATGTGGGAGGGGG  
 103 TGTGGGAGGGGGCTT  
 109 TTGCCCCGATAGCGG  
 110 GCTTGCCCCGATGGC  
 115 GGCTTGCCCCGATGG  
 121 CTTGCCCCGATAGCG  
 136 GGGGGCTTGCCTCCGA  
 138 AGGGGGCTTGCCTCCG  
 139 GGGGCTTGCCTCCGAT  
 144 TGTGGGAGGGAGCT  
 151 GGGAGGGGGCTTGCCTC  
 152 GGAGGGGGCTTGCCTC  
 153 TGGGAGGGGGCTTGCCT  
 154 GAGGGGGCTTGCCTC  
 164 GCTTGCCCCGATAGC  
 173 GGCTTGCCCCGATAG  
 179 GGGCTTGCCCCGATA  
 180 CAAATGTGGGAGGGGG  
 183 TGTGCAGGGAGCTT  
 183 GGGCTTGCCCCGATG  
 198 TGCAGGGAGCTTGC  
 198 CCAGGGAGCTTGCCTC  
 200 GTGCAGGGAGCTTGC  
 200 GGCAGGGAGCTTGCCT  
 308 AAATGTGGGAGGGGG  
 382 AATGTGGGAGGGGGCT  
 399 AGGGGGCTTGCCCCG  
 404 GGGGGCTTGCCCCGA  
 409 ATGTGGGAGGGGGCTT  
 412 GGGGCTTGCCCCGAT  
 435 GAGGGGGCTTGCCCC  
 448 GGAGGGGGCTTGCCCC  
 464 GGGAGGGGGCTTGCCC  
 467 TGGGAGGGGGCTTGCC  
 578 TGTGGGAGGGGGCTTG  
 618 GTGGGAGGGGGCTTG

B Consensus Identity

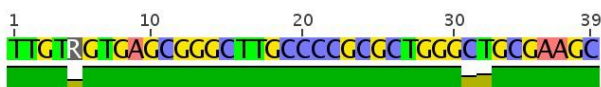

56 GCCCCGCGCTGGCTGG  
 56 TGCCCCGCGCTGGCTG  
 61 TTGCCCCGCGCTGGCT  
 62 CCGCGCTGGCTGCGA  
 64 TTGTGGTGAGCGGGCT  
 65 CCGCTGGGCTGCGAA  
 71 TTGTAGTGAGCGGGCT  
 74 GCGCTGGGCTGCGAAG  
 83 CGCTGGGCTGCGAAGC  
 98 GGTGAGCGGGCTTGCC  
 100 TGTGAGCGGGCTTGC  
 103 CCCCCGCGCTGGGCTG  
 103 GCCCCGCGCTGGGCTG  
 103 TGCCCCGCGCTGGGCT  
 105 CCGCGCTGGGCTGCG  
 113 TTGCCCCGCGCTGGG  
 115 TGTGGTGAGCGGGCTT  
 118 GTGGTGAGCGGGCTTGC  
 141 AGTGAGCGGGCTTGCC  
 143 TAGTGAGCGGGCTTGC  
 147 TGTAGTGAGCGGGCTT  
 153 GTAGTGAGCGGGCTTGC  
 210 CTTGCCCCGCGCTGGG  
 220 GGCTTGCCCCGCGCTG  
 220 GGGCTTGCCCCGCGCT  
 220 GCTTGCCCCGCGCTG  
 233 CCGGCTTGCCCCGCG  
 235 GCGGGCTTGCCCCGCG  
 235 AGCGGGCTTGCCCCG  
 237 GAGCGGGCTTGCCCCG  
 239 TGAGCGGGCTTGCCCC  
 241 GTGAGCGGGCTTGCCCC

C Consensus Identity

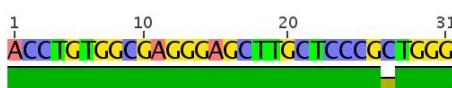

56 GGAGCTTGCTCCCCCT  
 66 GGGAGCTTGCTCCCCCT  
 68 GCTTGCTCCCGCTGGG  
 104 AGCTTGCTCCCGCTGG  
 105 GAGCTTGCTCCCGCTG  
 107 ACCTGTGGCGAGGGAG  
 111 GGAGCTTGCTCCCCCT  
 129 CCTGTGGCGAGGGAG  
 134 GGGAGCTTGCTCCCCG  
 197 CGAGGGAGCTTGCTCC  
 202 AGGGAGCTTGCTCCCC  
 208 GAGGGAGCTTGCTCCCC
