# Supplementary material for: Within-Genome Evolution of REPINs: a New Family of Miniature Mobile DNA in Bacteria
Source: PubMed Central journal article supplement (PMC3116915; doi:10.1371/journal.pgen.1002132), 2011-06-16

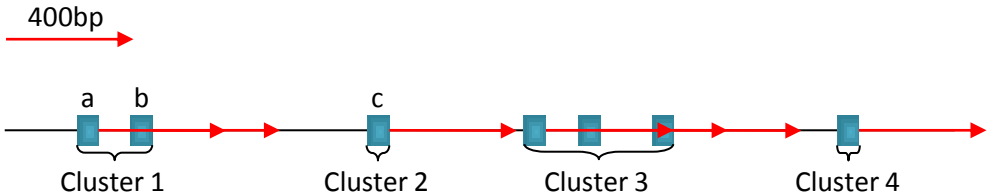

Supplement: pgen.1002132.s005.pdf [file pgen.1002132.s005.pdf]
