# Supplementary material for: Within-Genome Evolution of REPINs: a New Family of Miniature Mobile DNA in Bacteria
Source: PubMed Central journal article supplement (PMC3116915; doi:10.1371/journal.pgen.1002132), 2011-06-16
Supplement: pgen.1002132.s013.pdf [file pgen.1002132.s013.pdf]

**Table S2. Short sequence composition of the non-coding DNA flanking RAYTs.**

| Organism                              | Name of RAYT homologue | Pos <sup>a</sup> | Most abundant 16-mer in non-coding DNA flanking RAYTs | Freq | p-Value <sup>b</sup> | Palindromes (all 16-mers within the palindrome occur at least twice within the genome) |
|---------------------------------------|------------------------|------------------|-------------------------------------------------------|------|----------------------|----------------------------------------------------------------------------------------|
| <i>P. fluorescens</i> SBW25           | <i>yafM</i>            | 5'               | gggcaagcccgcctcac                                     | 241  | 2.00E-06             | gcggggcaagcccgc                                                                        |
| <i>P. fluorescens</i> SBW25           | <i>yafM</i>            | 3'               | gggcaagcccgcctcac                                     | 241  | 2.00E-06             | gggctgcttcgcagccc                                                                      |
| <i>P. fluorescens</i> SBW25           | <i>pflu2165</i>        | 5'               | gagggagcttgctccc                                      | 208  | 3.55E-06             | gggagcttgctccc                                                                         |
| <i>P. fluorescens</i> SBW25           | <i>pflu2165</i>        | 3'               | gagggagcttgctccc                                      | 208  | 3.55E-06             | gggagcttgctccc                                                                         |
| <i>P. syringae phaseolicola</i> 1448A | <i>pspph_4464</i>      | 3'               | gcaagctcgtcccac                                       | 28   | 4.57E-04             | gcgagcaagctcgc                                                                         |
| <i>P. syringae phaseolicola</i> 1448A | <i>pspph_4464</i>      | 5'               | acgatcgcactttgcc                                      | 1    | 1                    | none                                                                                   |
| <i>P. syringae syringae</i> B728a     | <i>psyr_4421</i>       | 3'               | tcgcgagcaagctcgc                                      | 88   | 4.41E-06             | gcgagcaagctcgc                                                                         |
| <i>P. syringae syringae</i> B728a     | <i>psyr_4421</i>       | 5'               | atgtgattgtgatctc                                      | 1    | 1                    | none                                                                                   |
| <i>P. syringae syringae</i> B728a     | <i>psyr_4707</i>       | 3'               | ttcgcgaacaagttcg                                      | 201  | 3.40E-07             | gcgaacaagttcgc                                                                         |
| <i>P. syringae syringae</i> B728a     | <i>psyr_4707</i>       | 5'               | gtgtcgttgcgcaatg                                      | 1    | 1                    | none                                                                                   |
| <i>P. syringae phaseolicola</i> 1448A | <i>pspph_5043</i>      | 3'               | acggcgtgccactgcg                                      | 1    | 1                    | none                                                                                   |
| <i>P. syringae phaseolicola</i> 1448A | <i>pspph_5043</i>      | 5'               | ggagcggacttgcccg                                      | 42   | 2.40E-04             | gcggacttgcccg                                                                          |
| <i>P. syringae tomato</i> DC3000      | <i>pspto_0262</i>      | 3'               | gcgtgccgctgcgcaa                                      | 3    | 0.004                | none                                                                                   |
| <i>P. syringae tomato</i> DC3000      | <i>pspto_0262</i>      | 5'               | gagcggacttgctccgc                                     | 39   | 1.81E-04             | gcggacttgctccgc                                                                        |
| <i>P. fluorescens</i> SBW25           | <i>pflu3939</i>        | 5'               | gcaagccccctcccac                                      | 618  | 1.54E-07             | gggggcaagccccc                                                                         |
| <i>P. fluorescens</i> SBW25           | <i>pflu3939</i>        | 3'               | gtgggagggggttc                                        | 618  | 1.54E-07             | gggggcttgccccc                                                                         |
| <i>P. fluorescens</i> Pf-5            | <i>pfl_3160</i>        | 5'               | tcgccggcaagccggc                                      | 358  | 1.48E-07             | gccggcaagccggc                                                                         |
| <i>P. fluorescens</i> Pf-5            | <i>pfl_3160</i>        | 3'               | tcgccggcaagccggc                                      | 358  | 1.48E-07             | gccggcaagccggc                                                                         |
| <i>P. entomophila</i> L48             | <i>pseen5170</i>       | 5'               | gtaggagccagcttgc                                      | 95   | 1.62E-05             | gccagcttgctggcg                                                                        |
| <i>P. entomophila</i> L48             | <i>pseen5170</i>       | 3'               | aacactttatccacag                                      | 2    | 0.04                 | none                                                                                   |
| <i>T. sp HL-EbGR7</i>                 | <i>tgr7_2777</i>       | 3'               | tcggcctgaaggccga                                      | 50   | 1.59E-05             | gtcggcctgaaggccgac                                                                     |
| <i>T. sp HL-EbGR7</i>                 | <i>tgr7_2777</i>       | 5'               | tcgggctgaagccgga                                      | 80   | 6.01E-07             | gtcgggctgaagcccgac                                                                     |
| <i>P. putida</i> W619                 | <i>pputw619_5047</i>   | 5'               | gatcgcggcaagccg                                       | 20   | 2.66E-05             | cggcaagccg                                                                             |
| <i>P. putida</i> W619                 | <i>pputw619_5047</i>   | 3'               | tcgccggcaagccggc                                      | 229  | 1.79E-07             | ggcaagccggcttgcc                                                                       |
| <i>P. entomophila</i> L48             | <i>pseen4846</i>       | 5'               | caaggccgctcccaca                                      | 181  | 4.51E-06             | gggccgctgtgaggccc                                                                      |
| <i>P. entomophila</i> L48             | <i>pseen4846</i>       | 3'               | caaggccgctcccaca                                      | 181  | 4.51E-06             | gcgacacaaggccgc                                                                        |
| <i>P. putida</i> KT2440               | <i>pp_0568</i>         | 5'               | tgtgggagcggccttg                                      | 54   | 9.65E-06             | gcggccttgctcgc                                                                         |
| <i>P. putida</i> KT2440               | <i>pp_0568</i>         | 3'               | caaggccgctcccaca                                      | 54   | 9.65E-06             | gcgacacaaggccgc                                                                        |

|                                                  |                      |    |                   |     |          |                                                                                                         |
|--------------------------------------------------|----------------------|----|-------------------|-----|----------|---------------------------------------------------------------------------------------------------------|
| <i>P. putida</i> F1                              | <i>pput_0607</i>     | 5' | atgagggcgagccct   | 2   | 0.03     | tgagggcgaa <b>g</b> ccctca                                                                              |
| <i>P. putida</i> F1                              | <i>pput_0607</i>     | 3' | caagggcgcctcccaca | 140 | 3.50E-06 | cgctcccaca <b>g</b> gga <b>cc</b> g <b>cg</b>                                                           |
| <i>P. putida</i> W619                            | <i>pputw619_4597</i> | 3' | gcggccttggtcgcg   | 148 | 1.07E-06 | ggggctgcctt <b>g</b> ca <b>g</b> ccc                                                                    |
| <i>P. putida</i> W619                            | <i>pputw619_4597</i> | 5' | caagggcgcctcctaca | 119 | 3.21E-06 | ccgctcctac <b>ag</b> ggg                                                                                |
| <i>P. putida</i> GB1                             | <i>pputgb1_0613</i>  | 5' | tcgcgacacaagggccg | 235 | 1.71E-07 | ggggcgccttt <b>g</b> cg <b>g</b> ccc                                                                    |
| <i>P. putida</i> GB1                             | <i>pputgb1_0613</i>  | 3' | tcgcgacacaagggccg | 235 | 1.71E-07 | cgcgacaca <b>ag</b> ggcgcct <b>ac</b> aggg<br>at <b>cg</b> cg                                           |
| <i>P. putida</i> GB1                             | <i>pputgb1_5236</i>  | 5' | aaccgcctcccacag   | 62  | 6.32E-06 | g <b>cg</b> gg <b>tg</b> a <b>acc</b> gc                                                                |
| <i>P. putida</i> GB1                             | <i>pputgb1_5236</i>  | 3' | tcgcgggtaaacccgc  | 90  | 3.07E-06 | g <b>cg</b> gg <b>ta</b> a <b>acc</b> gc                                                                |
| <i>P. putida</i> KT2440                          | <i>pp_5176</i>       | 5' | agcccgcgaagagcc   | 26  | 3.20E-05 | ctcttcg <b>cg</b> gg <b>g</b> ga <b>g</b> ccc <b>gc</b> gaag                                            |
| <i>P. putida</i> KT2440                          | <i>pp_5176</i>       | 3' | cctgtgggagcggcg   | 86  | 5.25E-06 | g <b>cg</b> gg <b>g</b> ct <b>g</b> ccc <b>gc</b>                                                       |
| <i>P. putida</i> F1                              | <i>pput_5083</i>     | 5' | cgggagcgcgcgaa    | 33  | 4.07E-05 | ggcctcttcg <b>g</b> ggcgagccc <b>gc</b> gaag<br>agcc                                                    |
| <i>P. putida</i> F1                              | <i>pput_5083</i>     | 3' | gcccgctcccacaggg  | 70  | 1.19E-05 | g <b>cg</b> gg <b>cat</b> gccc <b>gc</b>                                                                |
| <i>P. putida</i> GB1                             | <i>pputgb1_1364</i>  | 5' | gccgcccgcgcggcg   | 35  | 1.33E-05 | ag <b>cg</b> cgcc <b>gc</b> gc <b>g</b> gg <b>cg</b> ct                                                 |
| <i>P. putida</i> GB1                             | <i>pputgb1_1364</i>  | 3' | gccgcccgcgcggcg   | 35  | 1.33E-05 | g <b>cg</b> ccc <b>gc</b> gc <b>g</b> gg <b>cg</b> gc                                                   |
| <i>P. entomophila</i> L48                        | <i>pseen3227</i>     | 5' | gcggatccatccgcga  | 151 | 6.50E-06 | g <b>cg</b> gat <b>cc</b> atcc <b>gc</b>                                                                |
| <i>P. entomophila</i> L48                        | <i>pseen3227</i>     | 3' | tcgcggatgaatccgc  | 151 | 6.50E-06 | g <b>cg</b> gat <b>ga</b> atcc <b>gc</b>                                                                |
| <i>P. putida</i> F1                              | <i>pput_3919</i>     | 5' | cgggtttaccgcgaa   | 404 | 1.75E-07 | g <b>cg</b> gg <b>tt</b> t <b>acc</b> gc                                                                |
| <i>P. putida</i> F1                              | <i>pput_3919</i>     | 3' | cctcaccagcgcg     | 2   | 0.03     | None                                                                                                    |
| <i>P. mendocina</i> ymp                          | <i>pmen_3135</i>     | 5' | ggtgcgcacggcgac   | 198 | 2.08E-07 | g <b>gt</b> g <b>cg</b> ca <b>cg</b> g <b>cg</b> ca <b>cc</b>                                           |
| <i>P. mendocina</i> ymp                          | <i>pmen_3135</i>     | 3' | ggtgcgcacggcgac   | 198 | 2.08E-07 | g <b>gt</b> g <b>cg</b> ca <b>cg</b> g <b>cg</b> ca <b>cc</b>                                           |
| <i>T. sp. HL-EbGR7</i>                           | <i>tgr7_1317</i>     | 5' | gtaggatggcгаааgс  | 14  | 1.43E-04 | atgggcaa <b>ag</b> cgata <b>g</b> cg <b>tg</b> ccc <b>at</b>                                            |
| <i>T. sp. HL-EbGR7</i>                           | <i>tgr7_1317</i>     | 3' | gtaggatggcгаааgс  | 14  | 1.43E-04 | atgggcaa <b>ag</b> caa <b>cg</b> cg <b>tg</b> ccc <b>at</b>                                             |
| <i>N. punctiforme</i> PCC 73102                  | <i>npun_f5543</i>    | 5' | gaggaaacgaaacccaa | 13  | 4.39E-04 | g <b>tt</b> g <b>g</b> g <b>tt</b> gagga <b>ac</b> gaa <b>acc</b> ca <b>ac</b>                          |
| <i>N. punctiforme</i> PCC 73102                  | <i>npun_f5543</i>    | 3' | atgttgggtttcgttc  | 13  | 4.39E-04 | g <b>tt</b> g <b>g</b> g <b>tt</b> tcg <b>tt</b> cct <b>ca</b> acc <b>ca</b> ac                         |
| <i>P. mendocina</i> ymp                          | <i>pmen_0731</i>     | 5' | cggattgcatccgggc  | 93  | 3.12E-06 | ccc <b>g</b> gatt <b>gc</b> atcc <b>gg</b> g                                                            |
| <i>P. mendocina</i> ymp                          | <i>pmen_0731</i>     | 3' | cggattgcatccgggc  | 93  | 3.12E-06 | ccc <b>g</b> gatt <b>gc</b> atcc <b>gg</b> g                                                            |
| <i>P. stutzeri</i> A1501                         | <i>pst_1052</i>      | 5' | attagccgaagcgta   | 4   | 0.0029   | t <b>g</b> gatt <b>ag</b> ccgaa <b>g</b> cg <b>ta</b> at <b>cc</b> g                                    |
| <i>P. stutzeri</i> A1501                         | <i>pst_1052</i>      | 3' | aaacgacggaagcgcc  | 2   | 0.03     | None                                                                                                    |
| <i>S. enterica</i> serovar Paratyphi A AKU 12601 | <i>sspa4070</i>      | 5' | cgcttaccgggcctac  | 18  | 7.57E-06 | gccc <b>g</b> g <b>tg</b> cgctt <b>cg</b> ctt <b>acc</b> gg <b>gc</b>                                   |
| <i>S. enterica</i> serovar Paratyphi A AKU 12601 | <i>sspa4070</i>      | 3' | gtaggccgataaggc   | 57  | 2.23E-07 | ag <b>g</b> cc <b>g</b> gata <b>ag</b> g <b>cg</b> t                                                    |
| <i>E. coli</i> K-12 DH10B                        | <i>yafM</i>          | 5' | tgctgatgacgct     | 77  | 2.26E-06 | g <b>cc</b> t <b>g</b> at <b>g</b> ca <b>cg</b> ctg <b>gc</b> g <b>ct</b> ct <b>at</b><br>cat <b>gc</b> |
| <i>E. coli</i> K-12 DH10B                        | <i>yafM</i>          | 3' | gtaggccgataaggc   | 106 | 2.26E-07 | ag <b>g</b> cc <b>g</b> gata <b>ag</b> g <b>cg</b> t                                                    |
| <i>P. aeruginosa</i> PAO1                        | <i>pa1154</i>        | 5' | gcgttattcgccctac  | 30  | 1.02E-06 | g <b>cg</b> ttatt <b>cg</b> c                                                                           |
| <i>P. aeruginosa</i> PAO1                        | <i>pa1154</i>        | 3' | gcgttattcgccctac  | 30  | 1.02E-06 | g <b>cg</b> ttatt <b>cg</b> c                                                                           |
| <i>P. aeruginosa</i> PA7                         | <i>pspa7_4226</i>    | 5' | gtaggcggaataacgc  | 7   | 3.15E-04 | g <b>cg</b> gaata <b>ac</b> gc                                                                          |

|                                |                    |    |                  |    |          |                               |
|--------------------------------|--------------------|----|------------------|----|----------|-------------------------------|
| <i>P. aeruginosa</i><br>PA7    | <i>pspa7_4226</i>  | 3' | gtagggcgaataacgc | 7  | 3.15E-04 | g <b>cg</b> aataa <b>cg</b> c |
| <i>P. aeruginosa</i><br>LESB58 | <i>pales_41671</i> | 5' | gtagggcgaataacgc | 26 | 8.11E-07 | g <b>cg</b> aataa <b>cg</b> c |
| <i>P. aeruginosa</i><br>LESB58 | <i>pales_41671</i> | 3' | gtagggcgaataacgc | 26 | 8.11E-07 | g <b>cg</b> aataa <b>cg</b> c |

All homologues are flanked by at least one 16-mer that is unusually over-represented within the respective genome of the bacterium. In all cases the 16-mer contains or is part of a palindrome or inverted repeat. Letters in red denote complementary base pairs. <sup>a</sup>Denotes whether the 16-mer was found in the extragenic space flanking the RAYT on the 5' or 3' side. <sup>b</sup>Proportion of different 16-mers that occur equally or more often than the most abundant 16-mer from the non-coding DNA flanking the RAYT homologue.
