# Supplementary material for: Within-Genome Evolution of REPINs: a New Family of Miniature Mobile DNA in Bacteria
Source: PubMed Central journal article supplement (PMC3116915; doi:10.1371/journal.pgen.1002132), 2011-06-16
Supplement: pgen.1002132.s015.pdf [file pgen.1002132.s015.pdf]

**Table S4. Correlation between REPINs and repeat families previously detected in SBW25.**

|                       | <b>GI REPINs<sup>a</sup></b> | <b>GII REPINs<sup>a</sup></b> | <b>GIII REPINs<sup>a</sup></b> |
|-----------------------|------------------------------|-------------------------------|--------------------------------|
| <b>R0<sup>b</sup></b> | 152                          | 0                             | 3                              |
| <b>R2<sup>b</sup></b> | 3                            | 85                            | 51                             |
| <b>others</b>         | 37 <sup>c</sup>              | 1                             | 0                              |

<sup>a</sup>Only exact matches of GI, GII and GIII 16-mers were considered when searching for REPINs. <sup>b</sup>Repeat families detected in SBW25 by Silby et al. (2009). <sup>c</sup>The high number of others for GI doublets is attributable to the presence of two different REP orientations within REPINs (TT-AA is found in R0, AA-TT is not).
