# Supplementary material for: Within-Genome Evolution of REPINs: a New Family of Miniature Mobile DNA in Bacteria
Source: PLoS Genet. 2011 Jun 16;7(6):e1002132. doi: 10.1371/journal.pgen.1002132 (PMC3116915; doi:10.1371/journal.pgen.1002132)
Supplement: Table S1 — Dinucleotide frequencies in P. fluorescens Pf0-1 and SBW25. (PDF) [file pgen.1002132.s012.pdf]

**Table S1. Dinucleotide frequencies in *P. fluorescens* Pf0-1 and SBW25.**

| Dinucleotides | Pf0-1       | SBW25       | Difference to Pf0-1 |
|---------------|-------------|-------------|---------------------|
| AA            | 0.047167435 | 0.046317477 | 2%                  |
| AC            | 0.055368846 | 0.054939965 | 1%                  |
| AG            | 0.051895004 | 0.052577167 | -1%                 |
| AT            | 0.043838038 | 0.042889754 | 2%                  |
| CA            | 0.070204044 | 0.072515172 | -3%                 |
| CC            | 0.077093329 | 0.081420588 | -6%                 |
| CG            | 0.104089616 | 0.095726792 | 8%                  |
| CT            | 0.051886151 | 0.052746299 | -2%                 |
| GA            | 0.063428452 | 0.056363832 | 11%                 |
| GC            | 0.107768012 | 0.109277776 | -1%                 |
| GG            | 0.076447517 | 0.081610249 | -7%                 |
| GT            | 0.054290163 | 0.055384886 | -2%                 |
| TA            | 0.017469547 | 0.021527881 | -23%                |
| TC            | 0.063042953 | 0.056770672 | 10%                 |
| TG            | 0.069502162 | 0.072722386 | -5%                 |
| TT            | 0.046504227 | 0.047209105 | -2%                 |
